# 1 **Title: Mathematical modeling of metastasis, a feasible way to** 2 **detect the weakness**

3 **A. Guerra<sup>1</sup>, E. Silva<sup>1</sup>, R. Mansilla<sup>2</sup>, J. M. Nieto-Villar<sup>1</sup>**

4 *<sup>1</sup>Department of Chemical-Physics, A. Alzola Group of Thermodynamics of Complex Systems of M.V. Lomonosov Chair,*  
5 *Faculty of Chemistry, University of Havana, Cuba.*

6 *<sup>2</sup>Centro de Investigaciones Interdisciplinarias en Ciencias y Humanidades, UNAM, México.*

7 **Correspondence to:** Prof./Dr. J.M. Nieto-Villar, Department of Chemical-Physics, A. Alzola Group of  
8 Thermodynamics of Complex Systems of M.V. Lomonosov Chair, Faculty of Chemistry, University of Havana, Cuba.  
9 E-mail: nieto@fq.uh.cu; ORCID: <https://orcid.org/0000-0002-7214-1940>

10 Received: date month year

## 11 **Abstract**

12 **Aim:** Cancer is one of the main causes of death worldwide. 90% of deaths caused by this disease occur  
13 due to metastasis. Two models are proposed that rescue fundamental aspects of metastasis, such as EMT  
14 (epithelial-mesenchymal transition), extravasation and colonization.

15 **Methods:** To evaluate the complexity, the Lyapunov exponents, the eigenvalues of the Jacobian matrix  
16 (stability analysis) and the Kaplan York dimension were calculated.

17 **Results:** It was evidenced that the weakness of the metastasis lies in these stages, which indicates that they  
18 constitute potential targets in the search for an effective treatment.

19 **Conclusion:** The results suggest that strengthening the immune system during EMT as well as its  
20 specialization in the detection of DTCs (disseminated tumor cells) can be effective strategies in the  
21 treatment of metastasis.

22 **Keywords:** Metastasis, EMT, Mathematical models, Circulating Tumor Cells, Disseminated Tumor Cells

## 23 **INTRODUCTION**

24 Cancer is a generic name given to a group of cells that have lost their specialization and control of their  
25 growth <sup>[1]</sup>. According to the WHO <sup>[2]</sup>, being one of the main causes of death worldwide, the number of  
26 cases is expected to increase in the coming years. It is a system that self-organizes in time and space far  
27 from thermodynamic equilibrium, showing high adaptability, resistance and plasticity <sup>[1]</sup>.

28 Cancer groups more than 200 diseases, which have common characteristics such as: cells with resistance  
29 to apoptosis, induction of angiogenesis, sustained signals of cell proliferation, evasion of growth  
30 suppressants, replicative immortality, active invasion and metastasis <sup>[3, 4]</sup>. Metastasis is the major cause  
31 of death in the vast majority of cancer patients <sup>[5]</sup>. However, the mechanisms underlying each step of this  
32 complex process remains obscure.

33 In metastasis, the tumor usually invades the surrounding tissue and distant points in the body <sup>[6,7]</sup>.  
34 Metastasis presents key stages in which the body manages to fight the disease. These points are presented  
35 as targets to be used as treatments <sup>[8]</sup>. Among these stages are: Epithelial-Mesenchymal Transition (EMT),  
36 extravasation and colonization among others <sup>[8-10]</sup>.

37 EMT is a process that evades the immune system <sup>[11]</sup>, to perform invasion and colonization of adjacent  
38 and distant tissues <sup>[12]</sup>. EMT plays a fundamental role in embryonic development and metastasis <sup>[12]</sup>.

39 During the EMT process, cell-cell and cell-basement membrane interaction is lost. Cells lose the shape  
40 and typical polarity of the epithelial phenotype through genotypic changes <sup>[13]</sup>. These cells acquire a  
41 mesenchymal phenotype that is characterized by high invasive capacity and resistance to apoptosis <sup>[14]</sup>.  
42 EMT has the ability to modify cells of the immune system in the tumor microenvironment <sup>[15]</sup>.

43 In previous works we have shown that the growth of cancer studied through cell population models and  
44 interactions with immune cells, is a complex process. Control in such process could be precisely in that  
45 interaction with the immune system; this could be the source of its complexity and its adaptability <sup>[15,16]</sup>.  
46 In this sense, a model was proposed that simulates the effect of combined therapies (chrono-  
47 immunotherapy) for the treatment of cancer in the metastatic stage <sup>[17]</sup>.

48 The goal of this work is to propose two empirical models that rescue the essential characteristics of EMT  
49 and its link with metastasis, as well as a series of key stages, which are not favored in metastasis, which  
50 leads to delineating future ways to improve efficacy of treatments aimed at the metastasis process.

## 51 **METHODS**

52 Mathematical models represent a suitable procedure for formalizing the knowledge of living systems  
53 obtained through theoretical biology <sup>[18,19]</sup>. Mathematical modeling of tumor metastasis makes possible  
54 the description of regularities and it is useful in providing effective guidelines for cancer therapy, drug  
55 development, and clinical decision-making <sup>[19, 20]</sup>.

56 To carry out the mathematical modeling, the classical method of chemical kinetics was applied, which  
57 applies the law of mass action to a mechanism and to obtain a system of ordinary differential equations  
58 (ODEs).

59 Fixed points, stability analysis and bifurcations were calculated using the standard procedure <sup>[21-24]</sup>.  
60 Lyapunov exponents were calculated using the Wolf algorithm <sup>[22]</sup>. Lyapunov dimension  $DL$ , also known  
61 as Kaplan–Yorke dimension <sup>[25]</sup>, was evaluated across the spectrum of Lyapunov exponents  $\lambda_j$  as:

$$62 \quad D_L = j + \frac{\sum_{i=1}^j \lambda_i}{|\lambda_{j+1}|} \quad (1)$$

63 where  $\lambda_j$  is the largest integer number for which  $\lambda_1 + \lambda_2 + \dots + \lambda_j \geq 0$ .

64 COPASI v. 4.6.32 <sup>[26]</sup> software was used. However numerical integration was performed on the system of  
65 ODEs.

## 66 **RESULTS**

67 Tumor cells with epithelial phenotype composing the tumor receive the signal of duplication through  
68 growth factors <sup>[27]</sup>. These cells begin to make the phenotype change due to external factors, such as the  
69 effect of the microenvironment <sup>[28]</sup> and/or interaction with the immune system <sup>[29]</sup>. In 2017 Takigawa *et*  
70 *al.* <sup>[30]</sup> stated that mesenchymal stem cells induce epithelial to mesenchymal transition in colon cancer  
71 cells through direct cell-to-cell contact.

72 While transitioning between the epithelial and mesenchymal phenotypes, cells can stabilize hybrid  
73 epithelial/mesenchymal (E/M) phenotype. Cells in this phenotype have mixed epithelial and

74 mesenchymal properties, which allow them better adherence than mesenchymal cells and better migration  
 75 than epithelial cells, thereby allowing them to move collectively as clusters. If these clusters reach the  
 76 bloodstream intact, they can give rise to clusters of circulating tumor cells (CTCs), as have often been  
 77 seen experimentally<sup>[31]</sup>.

78 Based on the previous statements, we propose a model that takes into account EMT, according to the  
 79 network structure shown in Fig. 1.

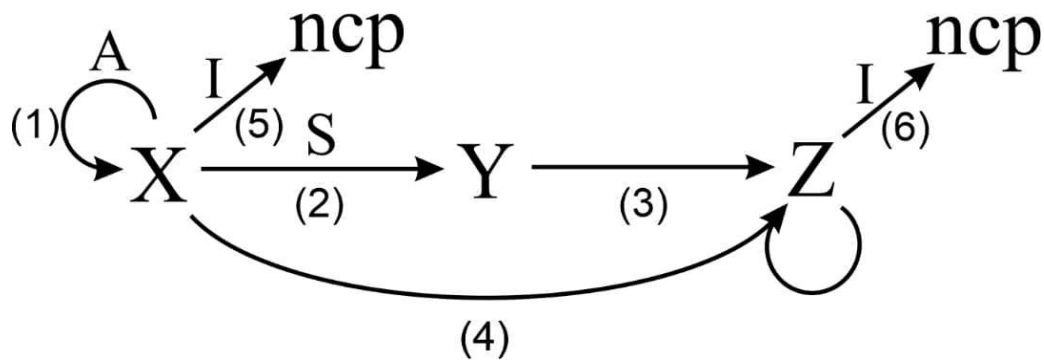

80

81 **Figure 1.** Model network of EMT.  $A$  represents the action of growth factors in the duplication  
 82 process;  $S$  represents the action of external factors at the beginning of metastasis;  $I$  represent the  
 83 population of immune cells;  $x$  represent the population of epithelial tumor cells,  $y$  represent the  
 84 population of hybrids tumor cells and  $z$  represent the population of mesenchymal tumor cells.

85 In the model  $A$  represents the action of growth factors in the duplication process and  $S$  represents the  
 86 action of external factors at the beginning of metastasis<sup>[32]</sup>;  $I$  is the population of immune cells (T  
 87 lymphocytes (CTL) and natural killer (NK))<sup>[30]</sup>,  $A$  and  $S$  are considered as constants due to the fact  
 88 that they quantify effects of internal and external factors; we posit  $I$  as the control parameter<sup>[34]</sup> because  
 89 the population of immune cells may increase or decrease. Variables:  $x$ ,  $y$ ,  $z$  represent the population  
 90 of epithelial, hybrids and mesenchymal tumor cells, respectively. Finally,  $n_{cp}$  represents a non-  
 91 cancerous product due to the action of immune cells.

92 Step 1 is related to the mitosis process aided by growth factors; step 2 is related to the beginning of the  
 93 MET until the formation of the hybrid phenotype, assisted by external transition factors such as snail<sup>[29]</sup>,  
 94 step 3 is the completion of the transition, from the hybrid phenotype to the mesenchymal phenotype; step  
 95 4 is related to induction of EMT to epithelial cells by mesenchymal stem cells<sup>[21]</sup>. Finally steps 5 and 6  
 96 show the action of immune cells  $I$ .

97 The constant values related to each step (see Fig. 1) were chosen empirically trying to achieve the greatest  
 98 generality and simplicity possible, so we have:  $k_1 = 4.7 \text{ ml/mmole.s}$ ,  $k_2 = 1 \text{ ml/mmole.s}$ ,

99  $k_3 = 1 \text{ s}^{-1}$ ,  $k_4 = 1 \text{ ml/mmole.s}$ ,  $k_5 = 2 \text{ ml/mmole.s}$  and  $k_6 = 2 \text{ ml/mmole.s}$ .

100 After these considerations, the system of ordinary differential equations (ODEs) which describes the  
 101 first steps of the cancer metastasis, according to the proposed model (Fig. 1), has the form:

$$\frac{dx}{dt} = 12.1x - y - 2xI$$

$$102 \quad \frac{dy}{dt} = 2x - y \quad (2)$$

$$\frac{dz}{dt} = y - 2zI$$

103 Table 1 shows the numerical results obtained from the stability analysis and the Lyapunov exponents, for  
104 two of the values of the control parameter.

105 **Table 1. Stability, and complexity for the system of ODEs for different values of the control**  
106 **parameter  $I$  ( $A = 3, S = 2$ ).**

| $I$           | Eigenvalues of the Jacobian matrix | Lyapunov exponents $\lambda_i$ |
|---------------|------------------------------------|--------------------------------|
| 3             | -0.05 -2.3i                        | -0.005                         |
| $ss_s$        | -0.05 +2.3i                        | -0.005                         |
| Stable focus  | -6.899                             | -6.896                         |
| 1             | 0.24 -2.4i                         | $\sim 0.0$                     |
| Limit cycle   | 0.24 +2.4i                         | -0.923                         |
| (saddle-foci) | -5.078                             | -7.054                         |

107 Fig. 2 shows the dynamical behavior of the proposed chemical network model for different values of the  
108 control parameter  $I$  (from 0 to 3). At  $I = 3$ , there is a stationary state. As  $I$  value decreases (Fig. 2),  
109 the system presents the same dynamic behavior but different values of fixed points. At the critical point  
110  $I = 2.3$ , dynamics change to a limit cycle. Thus, the dynamical behavior turns oscillatory (Table 1).

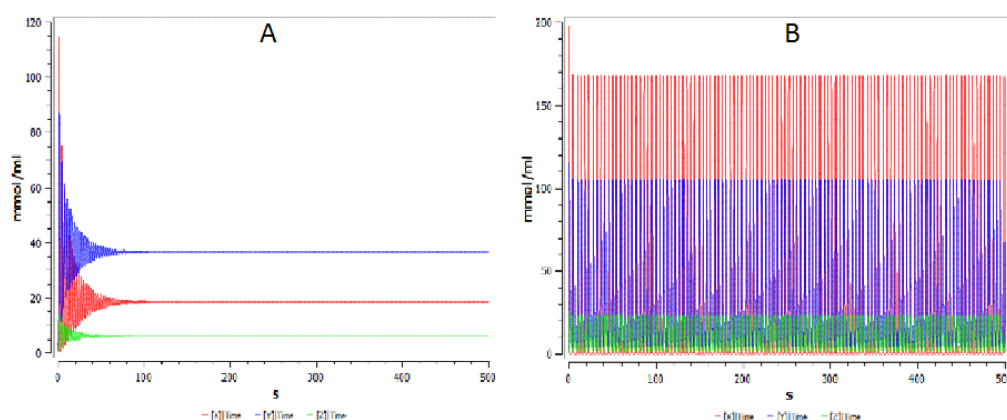

111 **Figure 2.** Dynamical behavior of the proposed model for different values of the control parameter  $I$   
112 ( $A = 3, S = 2$ ): (A) stationary state ( $I = 3$ ), (B) limit cycle ( $I = 1.8$ ); red (population of epithelial  
113 tumor cells  $x$ ), blue (population of hybrids tumor cells  $y$ ) and green (population of mesenchymal  
114 tumor cells  $z$ ).  
115

116 When cancer is in the stage of metastasis, it uses the EMT in order to circumvent the body's immune  
117 surveillance, as one of its strategies for the proliferation of the primary tumor and a secondary one [21].

118 Extremely inefficient processes occur in the final stages of metastasis, such as extravasation and  
 119 colonization, for example while numerous circulating tumor cells (CTCs) are detected in the blood,  
 120 disproportionately few metastatic cells are clinically detectable [18]

121 It is known that in these later stages of metastasis, cells have to face a new hostile microenvironment to  
 122 reach a pre-metastatic niche [34]. Niche formation was originally described as an accumulation of myeloid  
 123 cells expressing Vascular Endothelial Growth Factors (VEGFs) at distant metastatic sites before tumor  
 124 cells arrive [35] and it is characterized by the recruitment of neutrophils and macrophages [36].

125 Most tumors release millions of cells into the bloodstream, but only a small number of metastatic lesions  
 126 develop, indicating the inefficiency of the metastasis process [37], this means weakness of metastasis,  
 127 despite the fact that, as has been shown in previous work [16], metastasis is a highly robust process. In the  
 128 extravasation process, tumor cells undergo changes to improve adhesion; this process is closely related  
 129 to the populations of the immune system and to the action of the new microenvironment [37]. Once they  
 130 reach the niche, these cells can remain for long periods of time in a dormant state, which makes these  
 131 populations resist chemotherapies [38, 39].

132 It is unknown how the mechanisms of escape from tumor dormancy influence the survival and  
 133 development of secondary tumors [40]. Recent work proposes evidence of a new inflammatory mechanism  
 134 produced by immune cells that causes tumor cells in the lung to depart from dormancy to a more  
 135 aggressive metastasis [39].

136 Despite this, the process of metastasis, as stated before [5,6], constitutes the crucial stage in the evolution  
 137 of cancer and is responsible for the causes of death. In this sense, a second model is proposed that collects  
 138 the characteristics of cell populations in these stages of metastasis, such that it reflects its weaknesses,  
 139 which can be used as potential targets in treatment [42].

140 The following empirical model (see Fig.3) compile in a general way, the most important aspects of the  
 141 extravasation and invasion processes. In this model  $P$  represents the population of disseminated  
 142 tumor cells (DTCs) in metastatic niches,  $L$  represents the population of tumor cells in a dormant state,  
 143  $R$  represents the population of replicative cells once they leave the dormant state and  $I$  represents the  
 144 population of cells of the immune system (NK cell, T lymphocytes, neutrophils and macrophages, etc.).  
 145  $I$  value is taken as constant ( $I = 1$ ). Finally,  $ncp$  represents a non-cancerous product due to the action  
 146 of immune cells.

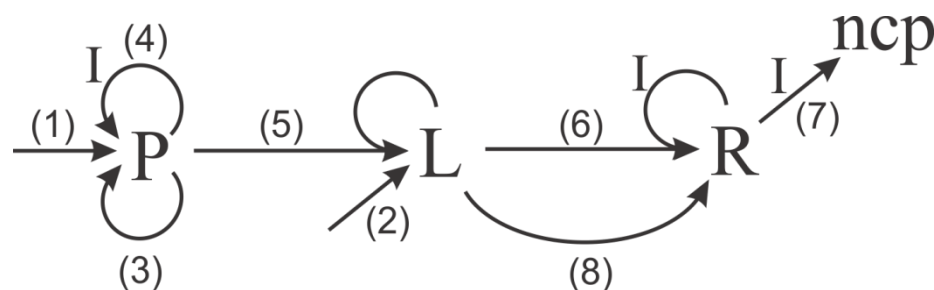

147  
 148 **Figure 3.** Model network of latest steps of metastasis.  $P$  represents the population of disseminated  
 149 tumor cells (DTCs) in metastatic niches,  $L$  represents the population of latent disseminated tumor cells,  
 150  $R$  represents the population of replicative cells once they leave dormancy and  $I$  represents the  
 151 population of cells of the immune system.

152 Steps 1 and 2 are related with the process of arrival of cancer cells to the niche, Depending on the

153 conditions of this niche, this population may proliferate or enter a dormant state. Steps 3 and 4 are related  
 154 to the beginning of proliferation and the action of the immune system to inhibit duplication (NK cell, T  
 155 lymphocytes) <sup>[42, 43]</sup>. Step 5 represents the arrival of proliferating cells to the niche where the latent tumor  
 156 remains. Step 6 is related to the action of the populations of the immune system (neutrophils and  
 157 macrophages) in leaving from the dormancy state. Step 7 is the action of the immune system (NK cell, T  
 158 lymphocytes) on the population of replicative cells that came out of the dormancy state. Finally step 8  
 159 represents the replication of the population of cells that emerged from the dormancy state.

160 The constants for the model proposed (see Fig. 3) were chosen empirically <sup>[6]</sup> trying to have a greater  
 161 generality and simplicity as possible, so we have:  $k_1 = 0.1 \text{ ml/mmol.s}$ ,  $k_2 = 0.1 \text{ ml/mmol.s}$ ,

162  $k_3 = 1 \text{ s}^{-1}$ ,  $k_4 = (0.45 - 0.1) \text{ ml/mmol.s}$ ,  $k_5 = 1 \text{ ml/mmol.s}$ , and  $k_6 = 1 \text{ ml/mmol.s}$ ,

163  $k_7 = 0.001 \text{ ml/mmol.s}$ ,  $k_8 = 24 \text{ ml/mmol.s}$ ,  $k_9 = 10 \text{ ml/mmol.s}$ .

164 According to the proposed model (Fig. 3), the system of ordinary differential equations (ODEs) which  
 165 describes the extravasation and colonization steps of the cancer metastasis, has the form:

$$\begin{aligned} \frac{dP}{dt} &= 0.1 + 0.9P + k_4 P^2 - PL \\ 166 \quad \frac{dL}{dt} &= 0.1 + PL - L - 10LR && (3) \\ \frac{dR}{dt} &= 10^{-3}L + 10LR - 24R \end{aligned}$$

167 DTCs in the secondary site microenvironment are known to evade immunevigilance of T lymphocytes  
 168 and NK cell <sup>[42, 43]</sup>. Furthermore, in EMT, the system self-organizes for a low population of the immune  
 169 system, as shown in the previous model (see Fig. 1). That is why it is used a constant value for  $I$   
 170 ( $I = 1$ ) and  $k_4$  is chosen as a control parameter since it reflects the dynamics of the immune system

171 in the growth of the secondary tumor. Thus, as the constant  $k_4$  increases its value, the action of the  
 172 immune system in tumor development decreases.

173 Table 2 shows the numerical results obtained from the stability analysis, the Lyapunov exponents and the  
 174 Kaplan-York dimension, for different values of the control parameter.

175

176

177

178

179

180

181

182

183

184 **Table 2. Stability, and complexity for the system of ODEs for different values of the control**

185 **parameter**  $k_4$  ( $I = 1$ ).

| $I$            | Eigenvalues of the Jacobian matrix |          | Lyapunov exponents $\lambda_i$ | $D_L$ |
|----------------|------------------------------------|----------|--------------------------------|-------|
| 0.1            | -0.06                              | -1.0008i | -0.055                         | 0     |
| $ss_s$         | -0.06                              | +1.0008i | -0.056                         |       |
| Stable focus   | -12.99                             |          | -12.986                        |       |
|                | 0.004                              | -1.0515i | $\sim 0.0$                     | 1     |
| 0.22           | 0.004                              | +1.0515i | -0.0116                        |       |
| Limit cycle    | -11.887                            |          | -11.7731                       |       |
|                | 0.064                              | -1.098i  | $\sim 0.0$                     | 2     |
| 0.34           | 0.064                              | +1.098i  | -0.0557                        |       |
| Quasi-periodic | -10.767                            |          | -10.1176                       |       |
|                | 0.089                              | -1.1163i | 0.055                          | 2.01  |
| 0.39           | 0.089                              | +1.1163i | $\sim 0.0$                     |       |
| Chaos          | -10.2964                           |          | -9.6983                        |       |

186 Fig. 4 show the dynamical behavior of the proposed network model for different values of the control  
 187 parameter  $k_4$  (from 0.45 to 0.1). At  $k_4 = 0.1$ , there is a stationary state. As  $k_4$  is increasing the  
 188 system presents the same dynamic behavior but different values of fixed points. However, at the critical  
 189 point  $k_4 = 0.22$ , dynamic behavior changes to a limit cycle. Thus, it turns oscillatory. As  $k_4$  continue  
 190 decreasing and reaches  $k_4 \approx 0.34$ , a new qualitative change occurs: the limit cycle suffers a distortion:  
 191 there exists two maxima for the values of each the oscillating variables ( $P, L, R$ ). And so on, a cascade  
 192 of bifurcations is triggered. The chaotic dynamics is reached at  $k_4 \approx 0.39$  (see fig. 4 D, Table 2).

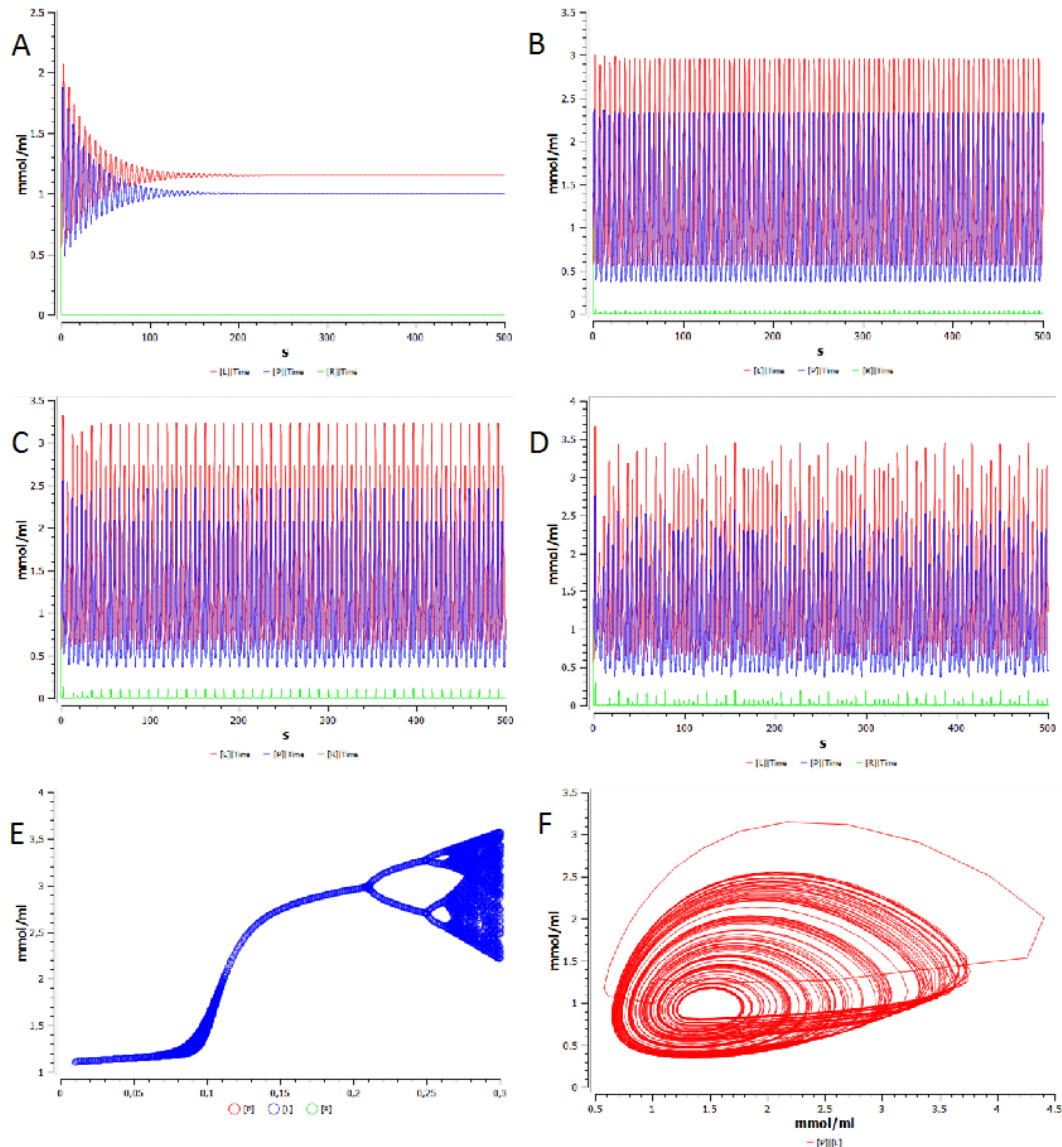

193

194 **Figure 4.** Dynamical behavior and bifurcation diagram of the proposed model for different values of

195 the control parameter  $k_4$  ( $I = 1$ ): (A) stationary state ( $k_4 = 0.1$ ), (B) limit cycle ( $k_4 = 0.15$ ), (C)

196 quasiperiodic ( $k_4 = 0.23$ ), (D) Chaos ( $k_4 = 0.35$ ), (E) route to chaos, (F)-chaos like attractor; Red

197 corresponds to L populations (cells in dormant state), blue color corresponds to P population (DTC and

198 proliferative cells) and green corresponds to R (cells out of dormant state).

## 199 DISCUSSION

200 As previously mentioned, one of the processes by which cancer in the metastatic stage evades the immune

201 system is EMT. The system self-organizes outside the thermodynamic equilibrium in an oscillatory regime

202 (fig. 2 B). It confers greater robustness and therefore adaptability and resistance to therapies [44, 45]. In figure

203 2 it is observed that, as the population of cells of the immune system increases, the process goes to a stable

204 steady state (fig. 2 A). On the other hand it is observed that, when the system loses self-organization, the

205 population of hybrids tumor cells decreases as the systems display a hybrid epithelial-mesenchymal



206 configuration, thus what is reported in the results suggests that EMT is rarely an all-or-nothing process [46].  
207 Tian *et al.* [47] stated how increasing the T cell population leads to decreased EMT. It is therefore that a  
208 combined immune therapy and directed to the EMT, would lead to decrease the robustness of the system  
209 and consequently to increase the efficacy in the treatment of tumors in advanced phase. Resistance to  
210 therapeutic regimens is a key problem for cancer therapy, as it precludes complete remove of the tumour  
211 and enables tumour recurrence, which is one of the main causes of death [10, 41].

212 The colonization and outgrowth of tumor cells in a secondary organ is often considered the rate-limiting,  
213 as well as the most poorly delineated step in the metastatic cascade [29]. Pre-metastatic niche theory shows  
214 that before arriving disseminated tumor cells (DTC), bone marrow-derived haematopoietic stem cells are  
215 recruited by tumour-derived factors to the secondary site where they transfer a more hospitable  
216 microenvironment to foster the survival and expansion of metastatic lesions [40]. According to the self-  
217 seeding hypothesis, metastatic tumor cells can also return to the primary site, accelerating the growth and  
218 malignant evolution of primary tumors [48].

219 Metastasis is known to be a highly complex process (see Figure 4D), which overlaps the immune system  
220 [27]. In this model, we observe how the System behaves when varying the growth rate of DTCs. The  
221 appearance of chaotic dynamical the model could explain the relapses and poor prognosis of the disease.  
222 Such behavior maybe gives a higher degree of robustness, and the possibility of creating new information  
223 and learning ability.

224 This is why the design of a therapy that focuses, at this stage, on enhancing the immune action focused  
225 on the growth of DTCs in the niche will have greater efficacy. As seen in Figure 4, as the control  
226 parameter decreases, the population of disseminated tumor cells will decrease, leading to a decrease in  
227 the complexity of the metastatic lesion. In other words, this process is related to the increased action of  
228 the immune system. This would lead the system to lose self-organization (see fig. 4A), leading to a less  
229 robust steady state (See Table 2).

230 At this stage of metastasis, dormant tumors (L) in secondary sites also play an important role in tumor  
231 regression after surgical recession [49]. In addition, cells when leaving the latency (R) show a more  
232 aggressive behavior [50]. This is why self-organization at this stage makes resistance to therapy more  
233 pronounced. [17] In other words, becomes more robust and consequently exhibits a greater adaptation to  
234 the conditions of the environment.

235 In this work, we propose models that represent tumor metastasis: a process out of thermodynamic  
236 equilibrium that goes through different stages. From the stages contained in the previous discussion, we  
237 postulate that EMT, extravasation, and colonization play a crucial role in the metastasis process. For this,  
238 we elaborate two models that reproduce some of the main characteristics.

239 In summary, in this paper we have found that:

240 1. A therapy aimed at boosting the immune system in a combined way and directing it to EMT, would  
241 lead to decrease the self-organization, by decreasing complexity and consequently robustness of  
242 the system. This should lead to increase the efficacy in the treatment of tumors in advanced phase.  
243 This process gives the system a route to evade the immune system and it gives the cells in the  
244 bloodstream a greater survival potential.

245 2. A therapy aimed at specializing the immune system against DTCs could reduce resistance and  
246 adaptability of tumors in the last stages of the metastatic cascade, making the system less robust.

247 The current theoretical framework will hopefully provide a better understanding of cancer and contribute

248 to improvements in cancer treatment.

## 249 **DECLARATIONS**

### 250 **Acknowledgments**

251 Prof. Dr. A. Alzola and Prof. Dr. Germinal Cocho *in memoriam*. JMNV thanked the CEIICH of the  
252 UNAM Mexico for the warm hospitality.

### 253 **Authors' contributions**

254 All authors contributed equally to the completion of this article.

### 255 **Availability of data and materials**

256 Not applicable.

### 257 **Financial support and sponsorship**

258 The financial support by PREI-DGAPA-2019

### 259 **Conflicts of interest**

260 All authors declared that there are no conflicts of interest.

### 261 **Ethical approval and consent to participate**

262 “Not applicable.”

### 263 **Consent for publication**

264 Not applicable.

### 265 **Copyright**

266 © The Author(s)

## 267 **REFERENCES**

- 268 [1]. Kitano, H., Systems Biology : A Brief Overview. Science 2002; 295(5560): 1662–1664.
- 269 [2]. WHO official webpage available from: <https://www.who.int/health-topics/cancer>.
- 270 [3]. Hanahan D, Weinberg RA. The Hallmarks of Cancer Review Douglas. Cell 2000; 100(7):57–70.
- 271 [4]. Hanahan D, Weinberg RA. Hallmarks of cancer: the next generation. Cell 2011; 144(5):646–74.
- 272 [5]. Manfredi S, Lepage C, Hatem C, Coatmeur O, Faivre J, *et al*. Epidemiology and management of  
273 liver metastases from colorectal cancer. Ann Surg 2006; 244:254-9.
- 274 [6]. Talmadge JE, Fidler IJ. AACR centennial series: the biology of cancer metastasis: historical  
275 perspective. Cancer Res 2010; 70(14):5649–5669.
- 276 [7]. Lambert AW, Pattabiraman DR, Weinberg RA. Emerging biological principles of metastasis. Cell  
277 2017; 168(4):670–691.
- 278 [8]. Mani, S. A., Guo, W., Liao, M.-J., Eaton, E. N., Weinberg, R. A., *et al*. The epithelial-  
279 mesenchymal transition generates cells with properties of stem cells. Cell 2008; 133(4): 704–715.
- 280 [9]. Biddle, A., Gammon, L., Liang, X., Costea, D. E., & Mackenzie, I. C. Phenotypic Plasticity  
281 Determines Cancer Stem Cell Therapeutic Resistance in Oral Squamous Cell Carcinoma.  
282 *EBioMedicine* 2016; 4: 138–145.
- 283 [10]. Cho, E. S., Cha, Y. H., Kim, H. S., Kim, N. H., & Yook, J. I. The pentose phosphate pathway as

- 284 a potential target for cancer therapy. *Biomolecules and Therapeutics* 2018; 26(1), 29–38.  
285 [doi:10.4062/biomolther.2017.179]
- 286 [11]. Kalluri R, Weinberg RA. The basics of epithelial-mesenchymal transition. *J Clin Invest*  
287 2009;119(6);1420–1428
- 288 [12]. Moreno-Bueno, G., Portillo, F., & Cano, A.. Transcriptional regulation of cell polarity in EMT  
289 and cancer. *Oncogene*, 2008; 27(55): 6958.
- 290 [13]. Salami, J., & Crews, C. M.. Waste disposal - An attractive strategy for cancer therapy. *Science*,  
291 2017; 355(6330): 1163–1167.
- 292 [14]. Dongre A, Weinberg RA.. New insights into the mechanisms of epithelial-mesenchymal  
293 transition and implications for cancer. *Nat Rev MolCell Biol* 2019; 20: 69–84.  
294 [doi:10.1038/s41580-018-0080-4].
- 295 [15]. Llanos-Pérez, J. A., Betancourt-Mar, J. A., Cocho, G., Mansilla, R., & Nieto-Villar, J. M.. Phase  
296 transitions in tumor growth: III vascular and metastasis behavior. *Physica A: Statistical*  
297 *Mechanics and Its Applications*, 2016; 462: 560–568. [doi:10.1016/j.physa.2016.06.086]
- 298 [16]. Guerra, A., Rodriguez, D. J., Silva, E., Mansilla R., Nieto-Villar, J. M. *et al.* Phase transitions  
299 in tumor growth VI: Epithelial–Mesenchymal transition. *Physica A: Statistical Mechanics and Its*  
300 *Applications*, 2018; 499: 208–215. [Doi:10.1016/j.physa.2018.01.040]
- 301 [17]. Guerra, A., Rodriguez, D. J., Silva, E., Cocho, G., & Nieto-villar, R. M. J. M. *et al.*  
302 Chronotherapy of cancer: Epithelial-Mesenchymal transition. *Journal of Gerontology* 2019; 4:  
303 124-127 [Doi:10.15406/mojgg.2019.04.00192].
- 304 [18]. Yang, J., & Weinberg, R. A. Epithelial-Mesenchymal Transition: At the Crossroads of  
305 Development and Tumor Metastasis. *Developmental Cell*, 2008; 14(6): 818–829.  
306 [Doi:10.1016/j.devcel.2008.05.009].
- 307 [19]. Simeoni C, Dinicola S, Cucina A, *et al.* Systems biology approach and mathematical modeling  
308 for analyzing phase- space switch during epithelial-mesenchymal transition. *Systems Biology*.  
309 2018; 1702: 95–123[doi: 10.1007/978-1-4939-7456-6\_7].
- 310 [20]. Lévi, F. Circadian chronotherapy for human cancers. *The lancet oncology* 2001; 2(5): 307315.
- 311 [21]. R.P. Araujo, D.L.S. McElwain, A history of the study of solid tumour growth: the contribution  
312 of mathematical modelling, *Bull. Math. Biol* 2004; 66 (5): 1039–1091.
- 313 [22]. Y.A. Kuznetsov, *Elements of Applied Bifurcation Theory*, vol. 112, Springer Science &  
314 Business Media, 2013.
- 315 [23]. N. Bellomo, N.K. Li, P.K. Maini. On the foundations of cancer modelling: selected topics,  
316 speculations, and perspectives, *Math. Models Methods Appl. Sci* 2008; 18 (04):593–646.
- 317 [24]. V.S. Anishchenko, T.E. Vadivasova, G.A. Okrokvetskikhov, G.I. Strelkova, Correlation analysis  
318 of dynamical chaos, *Physica A* 2003;325 (1):199–212.
- 319 [25]. P. Frederickson, J.L. Kaplan, E.D. Yorke, J.A. Yorke, The Liapunov dimension of strange  
320 attractors, *J. Differential Equations* 1983;49 (2) : 185–207.
- 321 [26]. Copasi Official Webpage, available from: <http://www.copasi.org>.
- 322 [27]. Boyer, B., Vallés, A. M., & Edme, N.. Induction and regulation of epithelial-mesenchymal  
323 transitions. *Biochemical Pharmacology*, 2000; 60(8): 1091–1099. [Doi:10.1016/S0006-  
324 2952(00)00427-5].

- 325 [28]. Suhail, Y., Cain, M. P., Vanaja, K., Kurywchak, P. A., Levchenko, A., *et al.* Systems Biology of  
326 Cancer Metastasis. *Cell Systems* 2019; 9(2): 109–127. [Doi: 10.1016/j.cels.2019.07.003]
- 327 [29]. El-Kenawi, A., Hänggi, K., & Ruffell, B. The Immune Microenvironment and Cancer  
328 Metastasis. *Cold Spring Harbor Perspectives in Medicine*, 2019; 10(4):a037424. [Doi:  
329 10.1101/cshperspect.a037424]
- 330 [30]. Takigawa, H., Kitadai, Y., Shinagawa, K., Yuge, R., Higashi, Y., *et al.* Mesenchymal Stem Cells  
331 Induce Epithelial to Mesenchymal Transition in Colon Cancer Cells through Direct Cell-to-Cell  
332 Contact. *Neoplasia*, 2017;19(5): 429–438.
- 333 [31]. Gründker, C., Läsche, M., Hellinger, J. W., & Emons, G. Mechanisms of Metastasis and Cell  
334 Mobility - The Role of Metabolism. *Geburtshilfe Und Frauenheilkunde*, 2019; 79(2): 184–188.  
335 [Doi:10.1055/a-0805-9113]
- 336 [32]. Jolly, M. K., Boareto, M., Huang, B., Jia, D., Lu, M., Onuchic, J. N., *et al.* Implications of the  
337 hybrid epithelial/mesenchymal phenotype in metastasis. *Frontiers in Oncology*, 2015; 5: 1–19.
- 338 [33]. L.G. de Pillis, A.E. Radunskaya, Modeling tumor–immune dynamics, in: *Mathematical Models*  
339 *of Tumor-Immune System Dynamics*, Springer, New York; 2014. pp. 59–108.
- 340 [34]. Tian L, Goldstein A, Wang H, Ching Lo H, Sun Kim I, *et al.* Mutual regulation of tumour vessel  
341 normalization and immunostimulatory reprogramming. *Nature* 2017; 544: 250–254.
- 342 [35]. Pokorný, J., Jandová, A., Nedbalová, M., Jelínek, F., Cifra, M., *et al.* Mitochondrial Metabolism  
343 – Neglected Link of Cancer Transformation and Treatment. *Prague Medical Report*, 2012; 113(2):  
344 81–94.
- 345 [36]. Peinado, H., Zhang, H., Matei, I. R., Costa-Silva, B., Hoshino, A., *et al.* Pre-metastatic niches:  
346 Organ-specific homes for metastases. *Nature Reviews Cancer* 2017; 17(5): 302–317.  
347 [Doi:10.1038/nrc.2017.6].
- 348 [37]. Negrath S, Sequist LV, Maheswaran S, Bell DW, Irimia D, *et al.* Isolation of rare circulating  
349 tumour cells in cancer patients by microchip technology. *Nature* 2007; 450: 1235–1239.
- 350 [38]. Massagué J, Obenauf AC. Metastatic colonization by circulating tumour cells. *Nature* 2016; 529:  
351 298–306. [doi:10.1038/nature17038]
- 352 [39]. Sosa MS, Bragado P, Aguirre-Ghiso JA. Mechanisms of disseminated cancer cell dormancy: An  
353 awakening field. *Nat Rev Cancer* 2014; 14: 611–622. [doi:10.1038/nrc3793]
- 354 [40]. Qian BZ, Pollard JW. Macrophage diversity enhances tumor progression and metastasis. *Cell*  
355 2010; 141: 39–51. [doi:10.1016/j.cell.2010.03.014]
- 356 [41]. Westhoff, P. G., de Graeff, A., Monninkhof, E. M., de Pree, I., van Vulpen, M., *et al.*  
357 Effectiveness and toxicity of conventional radiotherapy treatment for painful spinal metastases: a  
358 detailed course of side effects after opposing fields versus a single posterior field technique.  
359 *Journal of Radiation Oncology*, 2018; 7(1): 17–26.
- 360 [42]. Paolino M, Choidas A, Wallner S, Pranjic B, Uribealago I, *et al.* The E3 ligase Cbl-b and TAM  
361 receptors regulate cancer metastasis via natural killer cells. *Nature* 2014; 507: 508–512.
- 362 [43]. Romero I, Garrido C, Algarra I, Collado A, Garrido F, *et al.* T lymphocytes restrain spontaneous  
363 metastases in permanent dormancy. *Cancer Res* 2014; 74: 1958–1968.
- 364 [44]. A. Wolf, J.B. Swift, H.L. Swinney, J.A. Vastano, Determining Lyapunov exponents from a time  
365 series, *Physica D* 1985;16 (3) 285–317.
- 366 [45]. Thiery JP, Sleeman JP. Complex networks orchestrate epithelial - mesenchymal transitions.  
367 *Nature* 2006; 7:131-42.

- 368 [46]. Kaplan, R. N., Riba, R. D., Zacharoulis, S., Bramley, A. H., Vincent, L., *et al.* VEGFR1-positive  
369 haematopoietic bone marrow progenitors initiate the pre-metastatic niche. *Nature* 2005;  
370 438(7069), 820–827.
- 371 [47]. Liu Y, Cao X. Characteristics and significance of the pre-metastatic niche. *Cancer Cell* 2016;  
372 30: 668–681.
- 373 [48]. Comen, E., Norton, L. & Massague, J. Clinical implications of cancer self-seeding. *Nature Rev*  
374 *Clin. Oncol.* 2011; 8: 369–377.
- 375 [49]. Albrengues J, Shields MA, Ng D, Park CG, Ambrico A, *et al.* Neutrophil extracellular traps  
376 produced during inflammation awaken dormant cancer cells in mice. *Science* 2018; 361:  
377 eaao4227. [doi:10.1126/science .aao4227].
- 378 [50]. Summers, M. A., McDonald, M. M., & Croucher, P. I. Cancer Cell Dormancy in Metastasis.  
379 *Cold Spring Harbor Perspectives in Medicine*, 2019; 10(4) 1-9. a037556.  
380 [doi:10.1101/cshperspect.a037556]
